# Supplementary material for: Chemical Profiling, Antiproliferative and Antimigratory Capacity of Haberlea rhodopensis Extracts in an In Vitro Platform of Various Human Cancer Cell Lines
Source: MDPI journal article supplement (doi:10.3390/antiox11122305), 2022-11-22
Supplement: s1 [file s1]

**Table S1.** The optimal conditions for Multiple Reaction Monitoring (MRM) transitions of phenolic acid and flavonoids.

| Compound                       | Formula                                         | MW     | ESI      | [M-H] <sup>-/+</sup><br>(m/z) | MS frag-<br>ments (m/z) | Cone<br>voltage<br>(V) | Collision<br>energy<br>(eV) | Retention<br>time<br>(min) |
|--------------------------------|-------------------------------------------------|--------|----------|-------------------------------|-------------------------|------------------------|-----------------------------|----------------------------|
| 4-hydroxybenzoic acid          | C <sub>7</sub> H <sub>6</sub> O <sub>3</sub>    | 138.12 | negative | 136.95                        | 65.0<br>93.0            | 23<br>23               | 25<br>13                    | 1.88±0.01                  |
| Protocatechuic acid            | C <sub>7</sub> H <sub>6</sub> O <sub>4</sub>    | 154.12 | negative | 152.95                        | 108.95                  | 25                     | 13                          | 1.64±0.01                  |
| Gallic acid                    | C <sub>7</sub> H <sub>6</sub> O <sub>5</sub>    | 170.12 | negative | 168.95                        | 78.98<br>124.95         | 23<br>23               | 22<br>15                    | 1.37±0.02                  |
| Vanillic acid                  | C <sub>8</sub> H <sub>8</sub> O <sub>4</sub>    | 168.14 | negative | 167.0                         | 92.2<br>119.9           | 22<br>22               | 20<br>15                    | 2.23±0.02                  |
| Syringic acid                  | C <sub>9</sub> H <sub>10</sub> O <sub>5</sub>   | 198.17 | negative | 197.0                         | 122.95<br>182.0         | 27<br>27               | 23<br>13                    | 1.93±0.02                  |
| p-coumaric acid                | C <sub>9</sub> H <sub>8</sub> O <sub>3</sub>    | 164.16 | negative | 163.0                         | 119.0                   | 15                     | 13                          | 2.13±0.01                  |
| Caffeic acid                   | C <sub>9</sub> H <sub>8</sub> O <sub>4</sub>    | 180.16 | negative | 178.95                        | 134.95                  | 25                     | 13                          | 1.89±0.03                  |
| Ferulic acid                   | C <sub>10</sub> H <sub>10</sub> O <sub>4</sub>  | 194.18 | negative | 192.95                        | 134.0<br>178.0          | 26<br>26               | 25<br>12                    | 2.20±0.01                  |
| Rosmarinic acid                | C <sub>18</sub> H <sub>16</sub> O               | 360.32 | negative | 359.2                         | 161.0<br>197.0          | 10<br>10               | 15<br>15                    | 2.26±0.01                  |
| Chlorogenic acid               | C <sub>16</sub> H <sub>18</sub> O <sub>9</sub>  | 354.31 | negative | 353.1                         | 84.0<br>191.02          | 22<br>22               | 44<br>14                    | 1.70±0.01                  |
| Ellagic acid                   | C <sub>14</sub> H <sub>6</sub> O <sub>8</sub>   | 302.19 | negative | 301                           | 145.0<br>173.0          | 35<br>35               | 34<br>36                    | 2.00±0.01                  |
| 2'-hydroxyflavanone            | C <sub>15</sub> H <sub>12</sub> O <sub>3</sub>  | 240.27 | negative | 239                           | 119.3<br>93.1           | 40<br>40               | 25<br>16                    | 3.42±0.02                  |
| 7-hydroxyflavanone             | C <sub>15</sub> H <sub>12</sub> O <sub>3</sub>  | 240.27 | negative | 239.05                        | 135.2<br>91.15          | 41<br>41               | 25<br>23                    | 3.18±0.02                  |
| 4'-methoxyflavanone            | C <sub>16</sub> H <sub>14</sub> O <sub>3</sub>  | 254.29 | positive | 255.15                        | 240<br>161.3            | 31<br>31               | 17<br>22                    | 3.78±0.01                  |
| 5-methoxyflavanone             | C <sub>16</sub> H <sub>14</sub> O <sub>3</sub>  | 254.29 | positive | 255.15                        | 151.3                   | 34                     | 22                          | 3.49±0.01                  |
| Apigenin-7-O-glucoside         | C <sub>21</sub> H <sub>20</sub> O <sub>10</sub> | 432.38 | negative | 431.15                        | 268.35                  | 35                     | 22                          | 2.16±0.02                  |
| Luteolin-7-O-glucoside         | C <sub>21</sub> H <sub>20</sub> O <sub>11</sub> | 448.38 | positive | 449.15                        | 287.1                   | 34                     | 31                          | 2.01±0.01                  |
| Isorhamnetin                   | C <sub>16</sub> H <sub>12</sub> O <sub>7</sub>  | 316.28 | negative | 315                           | 151.0<br>300.2          | 43<br>43               | 30<br>20                    | 2.83±0.03                  |
| Quercetin-3-O-rhamnoside       | C <sub>21</sub> H <sub>20</sub> O <sub>11</sub> | 448.38 | negative | 447.01                        | 271<br>300              | 43<br>43               | 47<br>28                    | 2.27±0.01                  |
| Quercetin-3-O-rutinoside       | C <sub>27</sub> H <sub>30</sub> O <sub>16</sub> | 610.53 | negative | 609.1                         | 300<br>271              | 47<br>47               | 39<br>65                    | 1.92±0.01                  |
| Hyperoside                     | C <sub>21</sub> H <sub>20</sub> O <sub>12</sub> | 464.38 | negative | 463.3                         | 300<br>271.15           | 47<br>47               | 24<br>44                    | 1.99±0.02                  |
| Myricetin-3-galactoside        | C <sub>21</sub> H <sub>20</sub> O <sub>13</sub> | 480.38 | negative | 479.05                        | 271.1<br>287.1          | 48<br>48               | 39<br>44                    | 1.87±0.01                  |
| Kaempferol-3-O-rhamno-<br>side | C <sub>21</sub> H <sub>20</sub> O <sub>10</sub> | 432.39 | negative | 431.05                        | 255.3<br>284.2          | 45<br>45               | 42<br>28                    | 2.27±0.01                  |
| Ipriflavone                    | C <sub>18</sub> H <sub>16</sub> O <sub>3</sub>  | 280.33 | positive | 281.3                         | 240                     | 40                     | 19                          | 4.17±0.03                  |
| Naringin                       | C <sub>22</sub> H <sub>32</sub> O <sub>14</sub> | 580.54 | negative | 579.15                        | 271.1<br>151.5          | 45<br>45               | 33<br>40                    | 2.21±0.01                  |

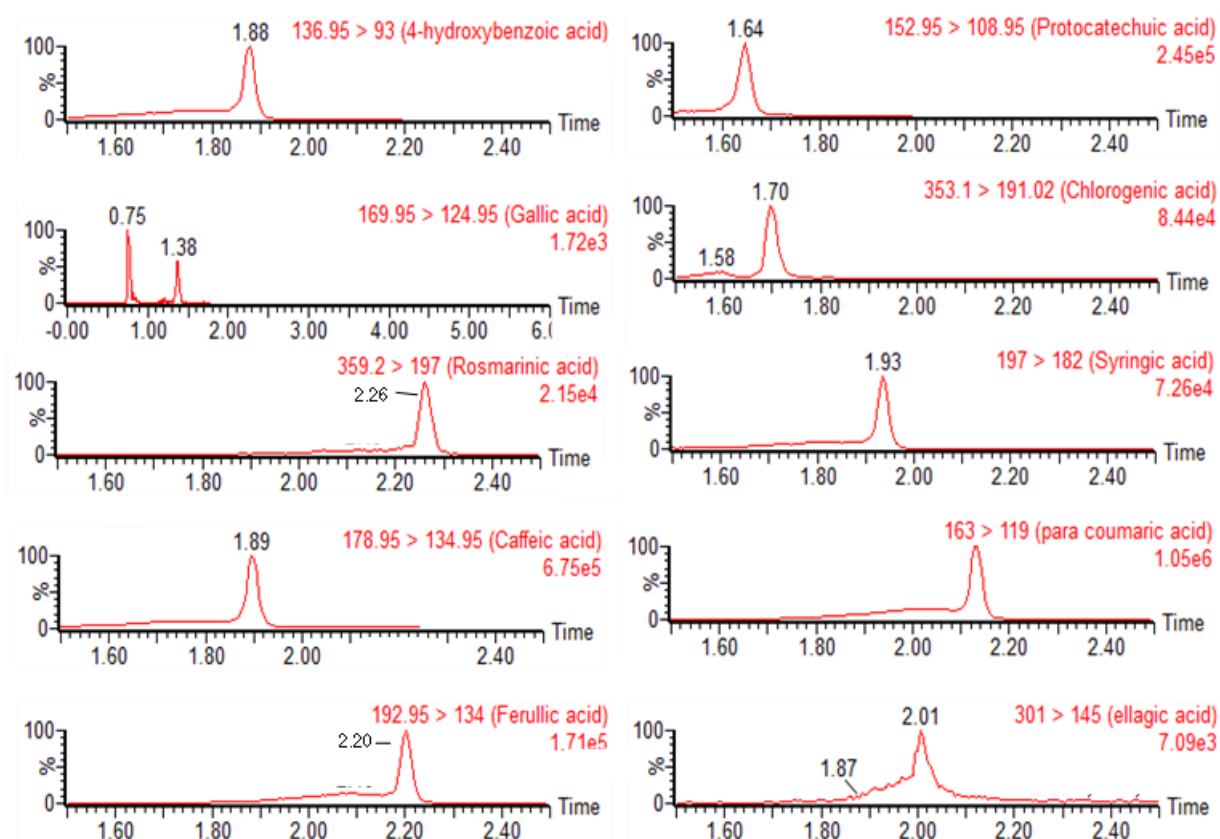

**Figure S1.** The chromatograms of the phenolic acid standards in the MRM mode, ionized in the negative ESI. The quantification signal is denoted into the spectra.

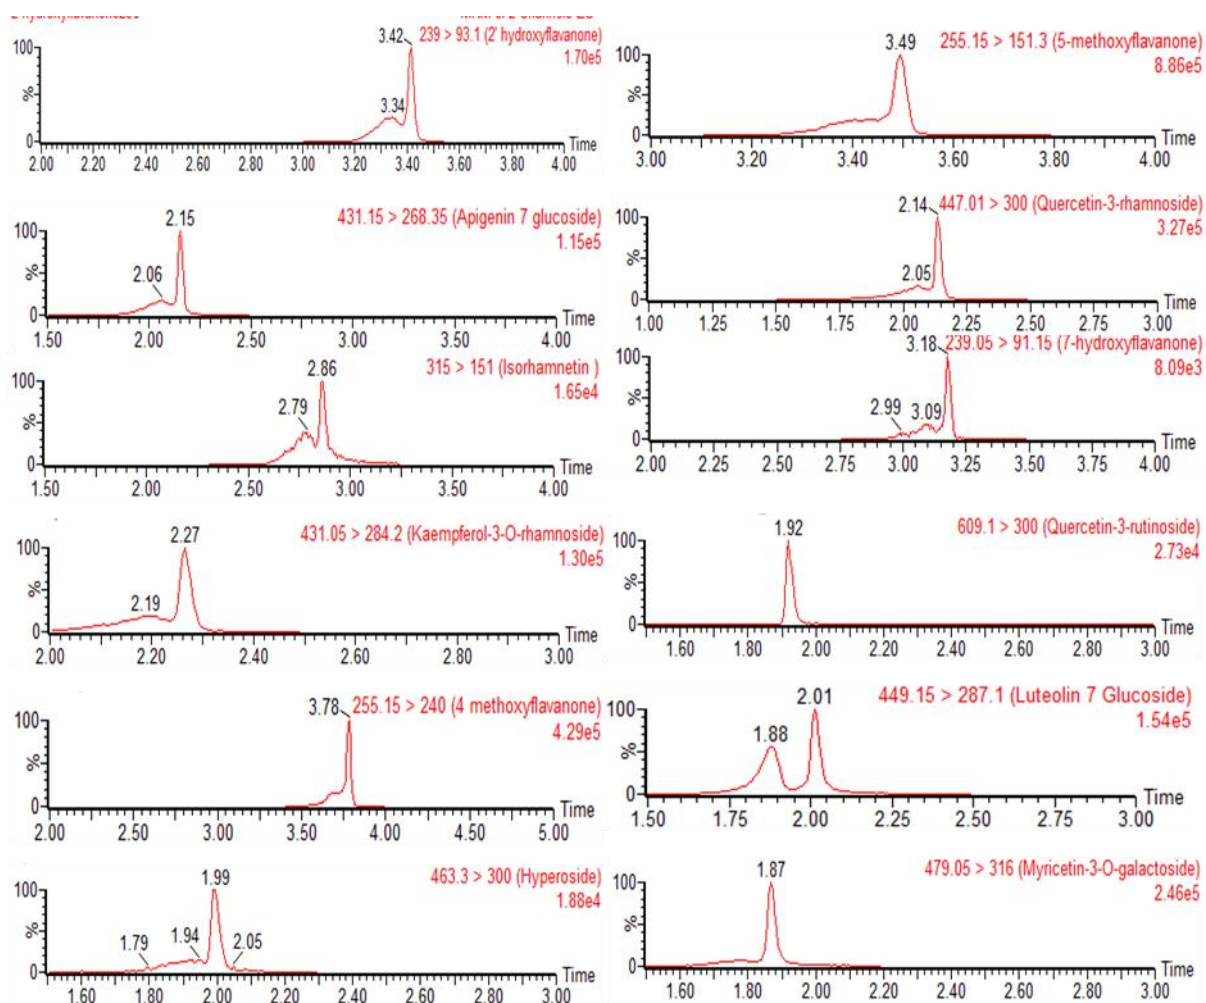

**Figure S2.** The chromatograms of the flavonoid standards in the MRM mode, ionized on both positive and negative ESI. The quantification signal is denoted into the spectra.



**Figure S3: Calibration curve of polyphenolic acids in a range of concentrations (0-500 ppb for phenolic acids and 1.95-250 ppb for flavonoids)**

**Table S2.** The LOD, LOQ, linearity, precision and accuracy results for the screened of phenolic acids.

| Compound                     | Linear range (ppb) | LOD (ppb)   | LOQ (ppb)    | Calibration equation <sup>a</sup> | Correlation coefficient (r <sup>2</sup> ) | %RSD                     |                          | %REC <sup>d</sup> |
|------------------------------|--------------------|-------------|--------------|-----------------------------------|-------------------------------------------|--------------------------|--------------------------|-------------------|
|                              |                    |             |              |                                   |                                           | (intra-day) <sup>b</sup> | (inter-day) <sup>c</sup> |                   |
| <b>4-hydroxybenzoic acid</b> | <b>3.01-499.50</b> | <b>3.01</b> | <b>14.20</b> | <b>y=36.87x-62.07</b>             | <b>0.9991</b>                             | 1.1                      | 2.28                     | 102.9             |
| Protocatechuic acid          | 0.66-504.50        | 0.66        | 14.70        | y=34.24x-69.4                     | 0.9995                                    | 1.2                      | 4.31                     | 99.8              |
| Gallic acid                  | 53.20-513.20       | 53.20       | 105.20       | y=0.67x-1.5                       | 0.9996                                    | 1.03                     | 2.65                     | 95.5              |
| Syringic acid                | 2.01-501.60        | 2.01        | 2.86         | y=7.28x-2.7                       | 0.9996                                    | 2.02                     | 4.10                     | 93.7              |
| p-coumaric acid              | 0.65-497.30        | 0.65        | 1.55         | y=52.84x+36.9                     | 0.9997                                    | 0.5                      | 1.95                     | 99.7              |
| Caffeic acid                 | 1.21-500           | 1.21        | 1.25         | y=92.95x-344.4                    | 0.9995                                    | 1.37                     | 2.1                      | 97.2              |
| Ferulic acid                 | 2.10-505.60        | 2.10        | 12.17        | y=19.02x-68.4                     | 0.9992                                    | 4.2                      | 2.53                     | 100.5             |
| Rosmarinic acid              | 2.32-499.50        | 2.32        | 2.56         | y=7.03x+12.34                     | 0.9996                                    | 0.78                     | 3.0                      | 101.2             |
| Chlorogenic acid             | 3.48-495.60        | 3.48        | 4.76         | y=25.02x+60.3                     | 0.9991                                    | 0.98                     | 1.99                     | 94.5              |
| Ellagic acid                 | 5.53-499.10        | 5.53        | 75.60        | y=2.18x+7.4                       | 0.9995                                    | 0.57                     | 4.6                      | 95.4              |
| 2'-hydroxyflavanone          | 19.50-250.00       | 19.50       | 20.12        | y=38.69x+22.5                     | 0.9998                                    | 0.65                     | 4.2                      | 89.9              |
| 7-hydroxyflavanone           | 1.97-249.90        | 1.97        | 2.21         | y=51.17x-73.6                     | 1                                         | 0.69                     | 4.2                      | 95.5              |
| 4'-methoxyflavanone          | 2.21-250.00        | 2.21        | 3.89         | y=83.54x+60.3                     | 0.9999                                    | 0.47                     | 4.3                      | 92.2              |
| 5-methoxyflavanone           | 6.47-248.50        | 6.47        | 8.52         | y=195.14x-493.9                   | 0.9992                                    | 0.58                     | 1.89                     | 98.7              |
| Apigenin-7-O-glucoside       | 1.87-125.30        | 1.87        | 4.42         | y=6.17x+3.8                       | 0.9998                                    | 1.12                     | 3.02                     | 96.5              |
| Luteolin-7-O-glucoside       | 2.21-250.10        | 2.21        | 2.22         | y=51.52x-89.9                     | 0.9998                                    | 1.32                     | 2.21                     | 96.6              |
| Isorhamnetin                 | 14.01-251.1        | 14.01       | 2.31         | y=6.08x-15.4                      | 0.9992                                    | 1.54                     | 1.87                     | 89.9              |
| Quercetin-3-O-rhamnoside     | 1.02-250.60        | 1.02        | 4.21         | y=60.83x-38.6                     | 0.9999                                    | 1.7                      | 1.94                     | 92.1              |
| Quercetin-3-O-rutinoside     | 1.40-251.30        | 1.40        | 4.32         | y=97.74x+109.7                    | 0.9999                                    | 1.01                     | 2.21                     | 94.7              |
| Hyperoside                   | 6.32-249.90        | 6.32        | 3.21         | y=3.97x+0.5                       | 0.9998                                    | 0.7                      | 2.45                     | 94.3              |
| Myricetin-3-galactoside      | 0.85-251.20        | 0.85        | 2.12         | y=26.38x-31.8                     | 0.9997                                    | 1.3                      | 3.02                     | 91.9              |
| Kaempferol-3-O-rutinoside    | 0.76-250.00        | 0.76        | 1.21         | y=25.73x+73.7                     | 0.9997                                    | 1.35                     | 1.98                     | 97.7              |
| Ipriflavone                  | 109.90-250.00      | 109.90      | 130.21       | y=0.62x+2.2                       | 0.9994                                    | 1.32                     | 3.05                     | 90.9              |
| Naringin                     | 3.01-250.60        | 3.01        | 1.21         | y=22.88x-43.3                     | 0.9997                                    | 2.7                      | 4.32                     | 101.0             |

<sup>a</sup>Chromatographic peak area (y) as a function of ppb concentration (x). <sup>b</sup>Values are means of intra-day assays (n=6). <sup>c</sup> Values are means of inter-day assays (n=6). <sup>d</sup> (n=3).

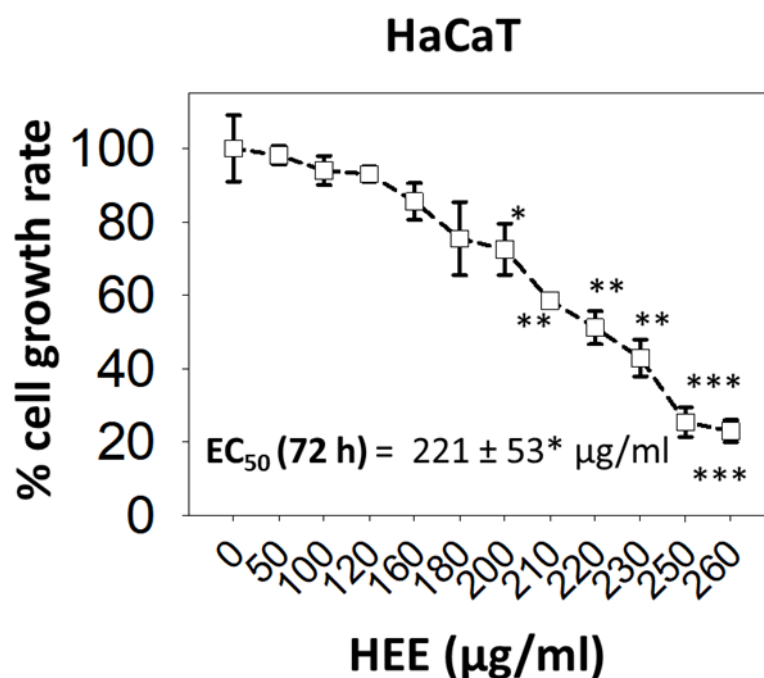

**Figure S4.** Antiproliferative effect of increasing doses of HEE and  $EC_{50}$  value at 72 hr against HaCaT cells. Data are representative of at least three independent experiments and are presented as means  $\pm$  SD. Asterisks indicate statistical significance in treated cells growth rate compared to control (Student's t-test, \* $p<0.05$ , \*\* $p<0.01$ , \*\*\* $p<0.001$ ).

**Table S3.** GC–MS based metabolite profiling of HEA (Haberlea rhodopensis ethanolic extract). Quantification of the detected metabolites was assessed based on the relative response compared to internal standard adonitol and expressed as relative abundance.

| Organic acids           |        |                                                                 |
|-------------------------|--------|-----------------------------------------------------------------|
| Lactic acid             | 1.02   | relative abundance compared to the internal standard (adonitol) |
| Malic acid              | 0.44   |                                                                 |
| Erythronic acid         | 0.23   |                                                                 |
| D-arabinonic acid       | 0.28   |                                                                 |
| Xylonic acid            | 1.93   |                                                                 |
| L-(+)-tartatic acid     | 2.67   |                                                                 |
| Ribonic acid            | 6.43   |                                                                 |
| Palmitic acid           | 0.65   |                                                                 |
| Sugars                  |        |                                                                 |
| D-(+)-xylose            | 0.32   | relative abundance compared to the internal standard (adonitol) |
| D-(-)-fructose          | 5.80   |                                                                 |
| D-(-)-Tagatose          | 4.46   |                                                                 |
| d-Glucose               | 22.47  |                                                                 |
| d-Galactose             | 3.72   |                                                                 |
| Sucrose                 | 109.77 |                                                                 |
| D-Mannitol              | 0.26   |                                                                 |
| Myoinositol             | 2.95   |                                                                 |
| Glucrol                 | 3.74   |                                                                 |
| Other organic molecules |        |                                                                 |
| Gluconic acid           | 0.20   | relative abundance compared to the internal standard (adonitol) |
| D-(-)-Tagatofuranose    | 8.90   |                                                                 |
| D-glucopyranoside       | 8.50   |                                                                 |

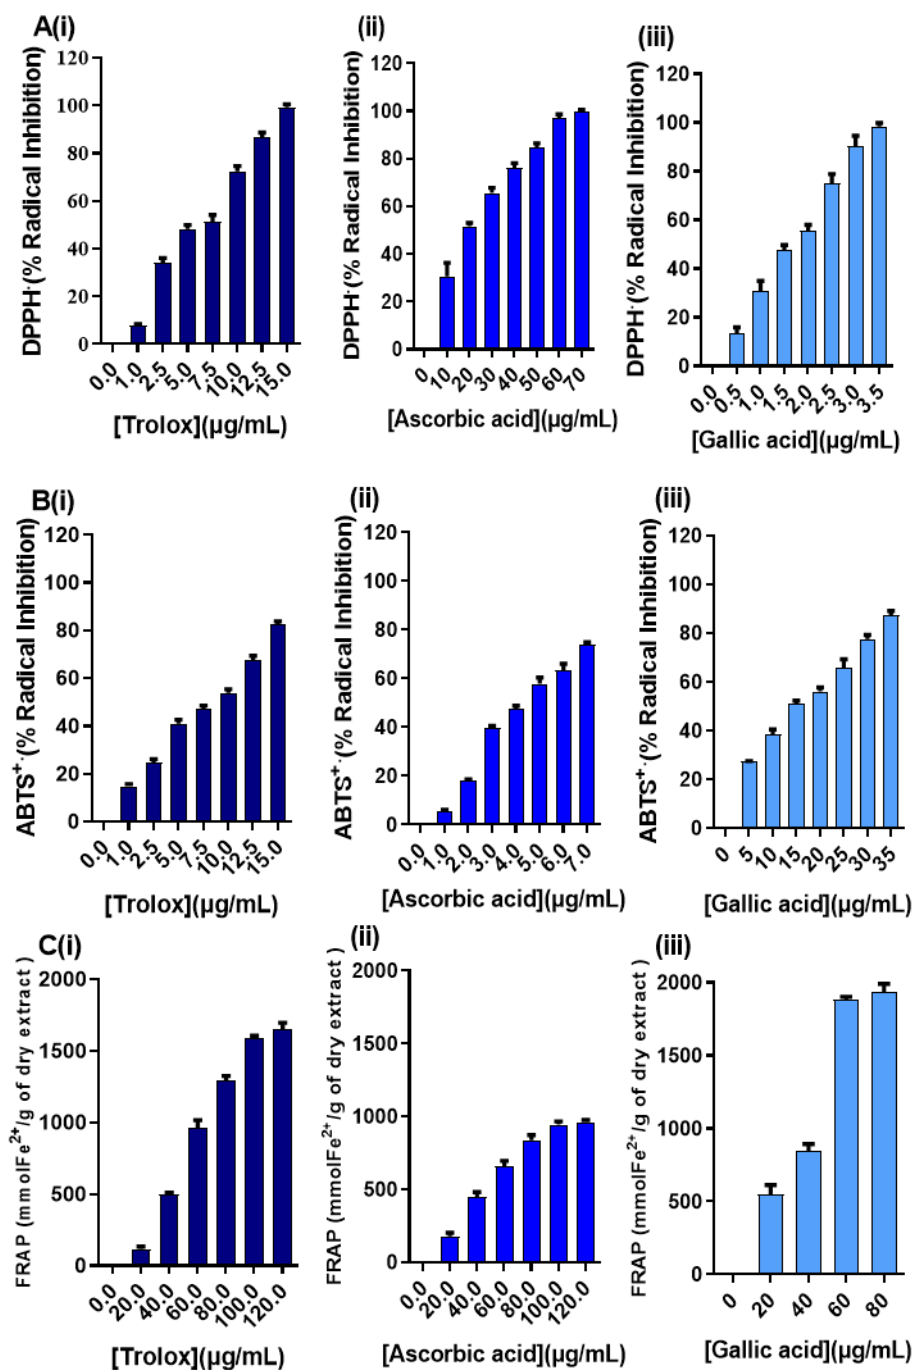

**Figure S5.** Antioxidant capacity of the positive controls; Trolox, Ascorbic acid and gallic acid as determined by (A) DPPH•, (B) ABTS•+ and (C) FRAP assay. Data are expressed as means  $\pm$  SEM and are representative of three independent experiments.
